# Supplementary material for: Sepsis-3 definitions predict ICU mortality in a low–middle-income country
Source: PubMed Central journal article supplement (PMC5093106; doi:10.1186/s13613-016-0204-y), 2016-11-02
Supplement: 13613_2016_204_MOESM4_ESM.pdf [file 13613_2016_204_MOESM4_ESM.pdf]

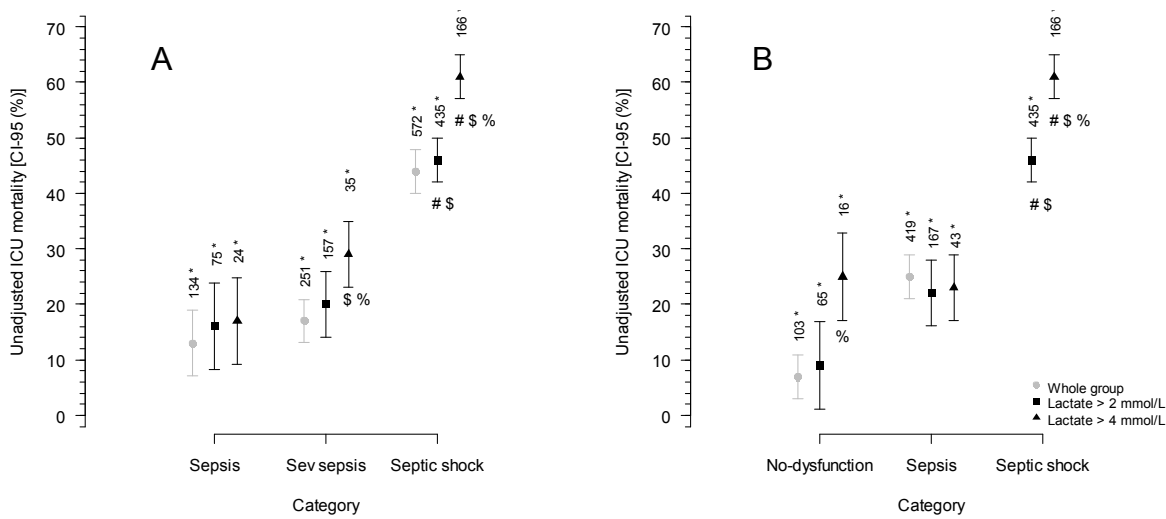

**Figure 2s:** Mortality according to the sepsis category and lactate concentration. **Panel A** shows the sepsis-2 categories. **Panel B** shows the sepsis-3 categories.

Lactate > 2 mmol/L represents all patients with lactate > 2 mmol/L, including those with lactate > 4 mmol/L

\* Number of patients in the category.

# Pearson's Chi-squared test  $P < 0.001$  among the three sepsis categories (same lactate level). Pearson's Chi-squared test  $P < 0.05$  *post-hoc* analysis vs. severe sepsis (same lactate level) category.

\$ Pearson's Chi-squared test  $P < 0.001$  among the three sepsis categories (same lactate level). Pearson's Chi-squared test  $P < 0.05$  *post-hoc* analysis vs. sepsis (same lactate level) category.

% Pearson's Chi-squared test  $P < 0.001$  among the three lactate categories (same sepsis category level). Pearson's Chi-squared test  $P < 0.05$  *post-hoc* analysis vs. whole group and Lactate > 2 mmol/L (same sepsis category level) categories.
